# Supplementary material
Source: Springer Nature journal article supplement (https://www.springermedizin.de/resource/supplementary/13223_2014_501_MOESM2_ESM.pdf/9596664)

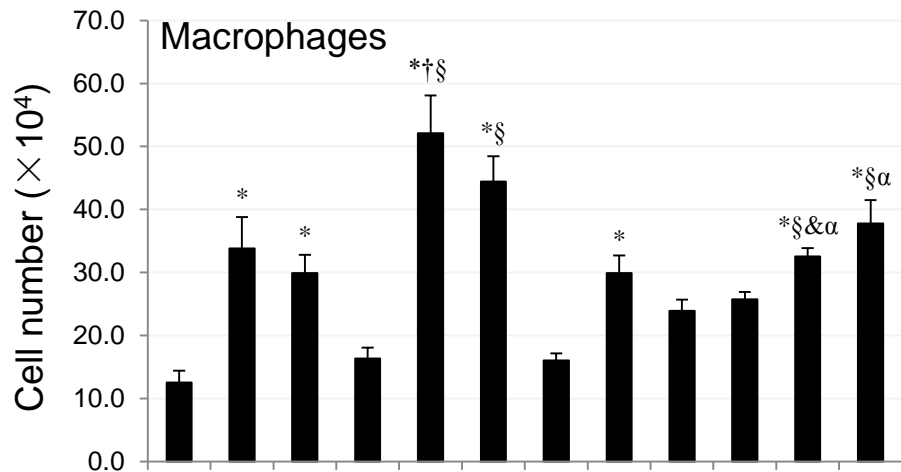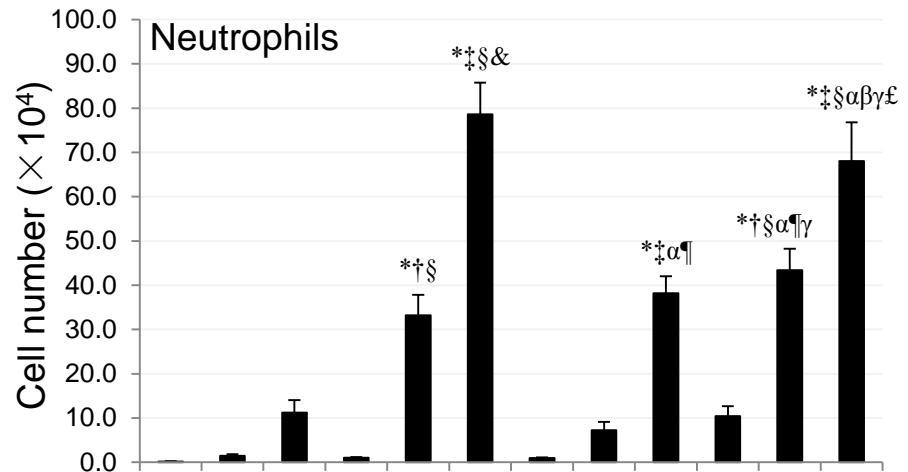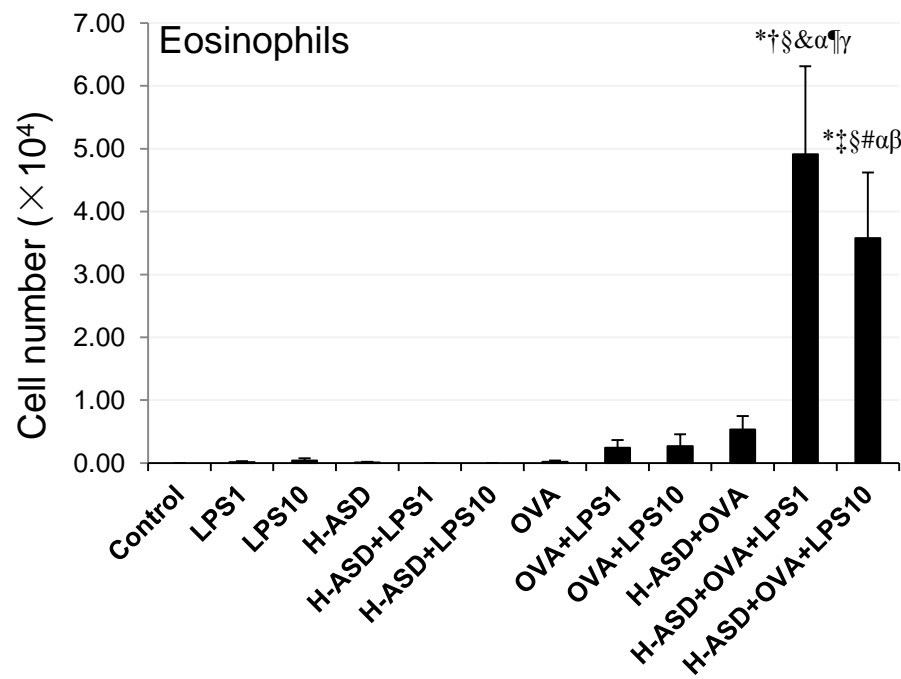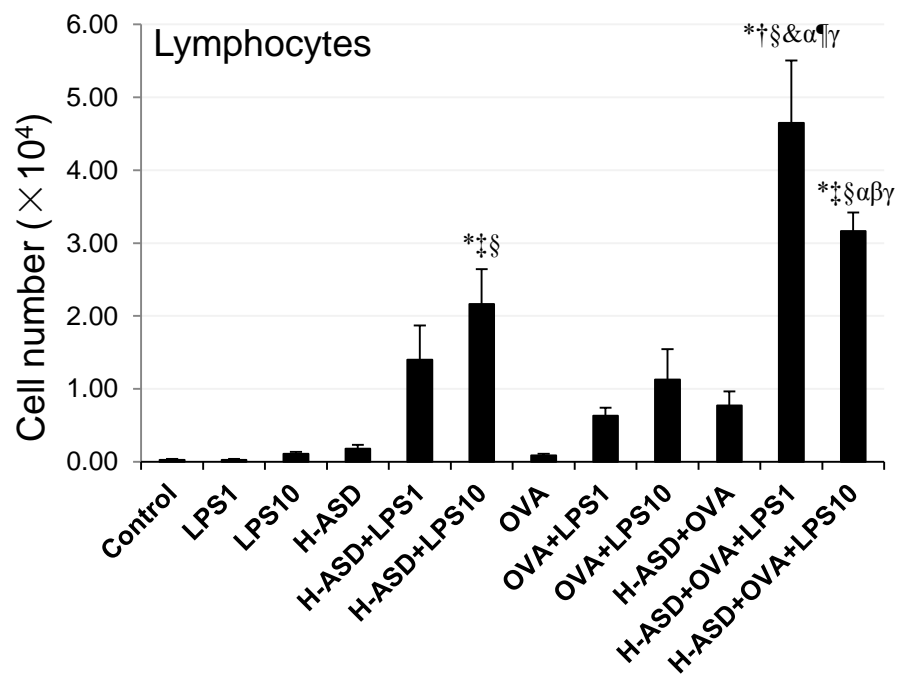

Supplement: MOESM2 [file 9596664]
